# Supplementary material for: Development and evaluation of a novel music-based therapeutic device for upper extremity movement training: A pre-clinical, single-arm trial
Source: PubMed Central journal article supplement (PMC7676671; doi:10.1371/journal.pone.0242552), 2020-11-19
Supplement: pone.0242552.s001.pdf [file pone.0242552.s001.pdf]

## De-Identified Datasets

Development and evaluation of a novel music-based therapeutic device for upper  
extremity movement training: a pre-clinical, single arm trial

Nina Schaffert<sup>1,3\*</sup>, Thenille Braun Janzen<sup>2</sup>, Roy Ploigt<sup>3</sup>, Sebastian Schlüter<sup>3</sup>, Veronica Vuong<sup>4</sup>,  
Michael H. Thaut<sup>4</sup>

<sup>1</sup> Department of Movement and Training Science, Institute for Human Movement Science,  
University of Hamburg, Hamburg, Germany.

<sup>2</sup> Center for Mathematics, Computing and Cognition, Universidade Federal do ABC, São  
Bernardo do Campo, Brazil.

<sup>3</sup> BeSB GmbH Berlin, Sound Engineering, Berlin, Germany.

<sup>4</sup> Music and Health Science Research Collaboratory, Faculty of Music, University of Toronto,  
Toronto, Canada.

\*Corresponding author  
E-mail: [nina.schaffert@uni-hamburg.de](mailto:nina.schaffert@uni-hamburg.de) (NS)

**Task 1**

| ID | TRIAL | CONDITION | SUM_KEY_ERRORS | RT_MEAN | RT_SD  |
|----|-------|-----------|----------------|---------|--------|
| 1  | 1     | Random    | 0              | 581.75  | 126.18 |
| 1  | 2     | Sequence  | 0              | 586.92  | 106.73 |
| 1  | 3     | Random    | 0              | 602.83  | 129.38 |
| 1  | 4     | Sequence  | 0              | 574.33  | 95.42  |
| 1  | 5     | Sequence  | 0              | 536.42  | 81.87  |
| 1  | 6     | Random    | 0              | 571.25  | 90.76  |
| 1  | 7     | Random    | 0              | 604.33  | 129.16 |
| 1  | 8     | Sequence  | 0              | 544.33  | 80.66  |
| 2  | 1     | Random    | 0              | 605.75  | 188.66 |
| 2  | 2     | Sequence  | 0              | 540.75  | 75.36  |
| 2  | 3     | Random    | 0              | 538.75  | 92.10  |
| 2  | 4     | Sequence  | 2              | 514.57  | 69.88  |
| 2  | 5     | Sequence  | 0              | 495.83  | 56.59  |
| 2  | 6     | Random    | 0              | 513.08  | 59.87  |
| 2  | 7     | Random    | 0              | 513.00  | 91.18  |
| 2  | 8     | Sequence  | 0              | 495.17  | 58.61  |
| 3  | 1     | Random    | 0              | 551.58  | 158.93 |
| 3  | 2     | Sequence  | 0              | 487.42  | 67.25  |
| 3  | 3     | Random    | 0              | 465.00  | 57.89  |
| 3  | 4     | Sequence  | 0              | 445.50  | 57.62  |
| 3  | 5     | Sequence  | 0              | 456.75  | 59.38  |
| 3  | 6     | Random    | 0              | 464.00  | 44.04  |
| 3  | 7     | Random    | 0              | 464.58  | 59.20  |
| 3  | 8     | Sequence  | 0              | 442.17  | 59.90  |
| 4  | 1     | Random    | 0              | 563.92  | 92.08  |
| 4  | 2     | Sequence  | 0              | 559.50  | 100.02 |
| 4  | 3     | Random    | 0              | 548.92  | 75.05  |
| 4  | 4     | Sequence  | 0              | 514.58  | 79.24  |
| 4  | 5     | Sequence  | 0              | 512.67  | 72.09  |
| 4  | 6     | Random    | 0              | 510.08  | 52.54  |
| 4  | 7     | Random    | 0              | 564.92  | 112.70 |
| 4  | 8     | Sequence  | 0              | 504.58  | 73.57  |
| 5  | 1     | Random    | 0              | 750.92  | 300.86 |
| 5  | 2     | Sequence  | 0              | 634.25  | 172.46 |
| 5  | 3     | Random    | 0              | 495.00  | 62.55  |
| 5  | 4     | Sequence  | 0              | 486.50  | 64.24  |
| 5  | 5     | Sequence  | 0              | 508.00  | 75.21  |
| 5  | 6     | Random    | 0              | 485.33  | 94.91  |
| 5  | 7     | Random    | 0              | 519.00  | 147.35 |
| 5  | 8     | Sequence  | 0              | 468.25  | 68.60  |
| 6  | 1     | Random    | 0              | 523.25  | 64.98  |
| 6  | 2     | Sequence  | 0              | 529.50  | 66.41  |
| 6  | 3     | Random    | 0              | 511.42  | 71.56  |
| 6  | 4     | Sequence  | 0              | 497.58  | 68.95  |
| 6  | 5     | Sequence  | 0              | 507.42  | 50.82  |
| 6  | 6     | Random    | 0              | 535.67  | 85.80  |

|    |   |          |   |        |        |
|----|---|----------|---|--------|--------|
| 6  | 7 | Random   | 0 | 499.42 | 59.88  |
| 6  | 8 | Sequence | 0 | 516.00 | 72.62  |
| 7  | 1 | Random   | 0 | 513.33 | 61.40  |
| 7  | 2 | Sequence | 0 | 512.67 | 74.84  |
| 7  | 3 | Random   | 0 | 498.58 | 59.18  |
| 7  | 4 | Sequence | 0 | 474.75 | 61.42  |
| 7  | 5 | Sequence | 0 | 492.00 | 66.06  |
| 7  | 6 | Random   | 0 | 474.92 | 60.20  |
| 7  | 7 | Random   | 0 | 483.58 | 74.55  |
| 7  | 8 | Sequence | 0 | 477.50 | 54.16  |
| 8  | 1 | Random   | 0 | 515.58 | 66.72  |
| 8  | 2 | Sequence | 0 | 529.17 | 77.02  |
| 8  | 3 | Random   | 0 | 521.08 | 79.45  |
| 8  | 4 | Sequence | 0 | 514.67 | 71.07  |
| 8  | 5 | Sequence | 0 | 501.58 | 66.79  |
| 8  | 6 | Random   | 0 | 514.25 | 53.25  |
| 8  | 7 | Random   | 0 | 504.25 | 77.53  |
| 8  | 8 | Sequence | 0 | 492.50 | 71.70  |
| 9  | 1 | Random   | 0 | 659.67 | 249.08 |
| 9  | 2 | Sequence | 0 | 528.75 | 79.14  |
| 9  | 3 | Random   | 0 | 519.25 | 89.95  |
| 9  | 4 | Sequence | 0 | 495.50 | 74.51  |
| 9  | 5 | Sequence | 0 | 483.33 | 83.81  |
| 9  | 6 | Random   | 0 | 489.58 | 64.20  |
| 9  | 7 | Random   | 0 | 495.83 | 53.89  |
| 9  | 8 | Sequence | 0 | 482.75 | 59.17  |
| 10 | 1 | Random   | 0 | 528.92 | 139.23 |
| 10 | 2 | Sequence | 0 | 473.17 | 72.73  |
| 10 | 3 | Random   | 0 | 498.50 | 64.59  |
| 10 | 4 | Sequence | 0 | 503.17 | 104.64 |
| 10 | 5 | Sequence | 0 | 468.92 | 63.33  |
| 10 | 6 | Random   | 0 | 451.08 | 47.97  |
| 10 | 7 | Random   | 0 | 462.50 | 44.59  |
| 10 | 8 | Sequence | 0 | 524.67 | 191.69 |
| 11 | 1 | Random   | 0 | 470.83 | 45.32  |
| 11 | 2 | Sequence | 0 | 502.08 | 89.59  |
| 11 | 3 | Random   | 0 | 472.17 | 47.97  |
| 11 | 4 | Sequence | 0 | 460.17 | 51.56  |
| 11 | 5 | Sequence | 1 | 466.00 | 69.33  |
| 11 | 6 | Random   | 0 | 466.83 | 116.12 |
| 11 | 7 | Random   | 0 | 453.08 | 53.15  |
| 11 | 8 | Sequence | 0 | 449.75 | 33.33  |
| 12 | 1 | Random   | 0 | 427.17 | 122.98 |
| 12 | 2 | Sequence | 0 | 452.08 | 138.54 |
| 12 | 3 | Random   | 1 | 405.85 | 55.64  |
| 12 | 4 | Sequence | 0 | 427.50 | 91.00  |
| 12 | 5 | Sequence | 0 | 429.92 | 122.71 |
| 12 | 6 | Random   | 0 | 420.08 | 84.63  |

|    |   |          |   |        |        |
|----|---|----------|---|--------|--------|
| 12 | 7 | Random   | 0 | 398.83 | 49.59  |
| 12 | 8 | Sequence | 0 | 393.08 | 62.63  |
| 13 | 1 | Random   | 0 | 560.00 | 74.40  |
| 13 | 2 | Sequence | 0 | 553.83 | 63.26  |
| 13 | 3 | Random   | 0 | 536.58 | 64.59  |
| 13 | 4 | Sequence | 0 | 496.08 | 78.74  |
| 13 | 5 | Sequence | 0 | 520.92 | 60.30  |
| 13 | 6 | Random   | 0 | 580.75 | 159.89 |
| 13 | 7 | Random   | 0 | 539.58 | 99.78  |
| 13 | 8 | Sequence | 0 | 515.67 | 77.06  |
| 14 | 1 | Random   | 0 | 515.50 | 50.08  |
| 14 | 2 | Sequence | 0 | 534.42 | 104.14 |
| 14 | 3 | Random   | 0 | 536.08 | 67.16  |
| 14 | 4 | Sequence | 0 | 489.08 | 54.97  |
| 14 | 5 | Sequence | 0 | 500.58 | 77.88  |
| 14 | 6 | Random   | 0 | 495.83 | 71.34  |
| 14 | 7 | Random   | 0 | 494.58 | 70.38  |
| 14 | 8 | Sequence | 0 | 438.58 | 82.09  |
| 15 | 1 | Random   | 0 | 544.17 | 61.41  |
| 15 | 2 | Sequence | 0 | 508.00 | 66.64  |
| 15 | 3 | Random   | 0 | 597.25 | 155.32 |
| 15 | 4 | Sequence | 0 | 501.83 | 45.45  |
| 15 | 5 | Sequence | 0 | 496.42 | 66.21  |
| 15 | 6 | Random   | 0 | 508.67 | 117.33 |
| 15 | 7 | Random   | 0 | 496.42 | 46.57  |
| 15 | 8 | Sequence | 0 | 491.25 | 67.34  |
| 16 | 1 | Random   | 0 | 475.50 | 78.40  |
| 16 | 2 | Sequence | 0 | 470.17 | 77.32  |
| 16 | 3 | Random   | 0 | 465.08 | 79.55  |
| 16 | 4 | Sequence | 0 | 435.33 | 64.84  |
| 16 | 5 | Sequence | 0 | 531.33 | 159.09 |
| 16 | 6 | Random   | 0 | 439.92 | 65.19  |
| 16 | 7 | Random   | 0 | 489.67 | 134.71 |
| 16 | 8 | Sequence | 0 | 445.58 | 67.10  |
| 17 | 1 | Random   | 0 | 495.33 | 63.02  |
| 17 | 2 | Sequence | 0 | 495.25 | 51.80  |
| 17 | 3 | Random   | 0 | 487.75 | 60.38  |
| 17 | 4 | Sequence | 0 | 472.33 | 61.54  |
| 17 | 5 | Sequence | 0 | 488.08 | 81.15  |
| 17 | 6 | Random   | 0 | 491.67 | 111.73 |
| 17 | 7 | Random   | 0 | 449.42 | 66.57  |
| 17 | 8 | Sequence | 0 | 449.83 | 44.25  |
| 18 | 1 | Random   | 0 | 645.58 | 266.40 |
| 18 | 2 | Sequence | 1 | 624.23 | 167.66 |
| 18 | 3 | Random   | 0 | 542.00 | 40.06  |
| 18 | 4 | Sequence | 0 | 525.25 | 61.92  |
| 18 | 5 | Sequence | 0 | 508.83 | 30.85  |
| 18 | 6 | Random   | 0 | 518.42 | 44.24  |

|    |   |          |   |        |        |
|----|---|----------|---|--------|--------|
| 18 | 7 | Random   | 0 | 514.67 | 49.04  |
| 18 | 8 | Sequence | 0 | 483.33 | 45.18  |
| 19 | 1 | Random   | 0 | 496.83 | 54.92  |
| 19 | 2 | Sequence | 0 | 476.42 | 75.32  |
| 19 | 3 | Random   | 0 | 500.08 | 68.69  |
| 19 | 4 | Sequence | 0 | 470.00 | 60.29  |
| 19 | 5 | Sequence | 0 | 484.00 | 63.71  |
| 19 | 6 | Random   | 0 | 459.83 | 63.56  |
| 19 | 7 | Random   | 0 | 461.17 | 63.75  |
| 19 | 8 | Sequence | 0 | 493.58 | 53.72  |
| 20 | 1 | Random   | 0 | 514.08 | 101.06 |
| 20 | 2 | Sequence | 0 | 484.42 | 110.29 |
| 20 | 3 | Random   | 0 | 482.42 | 71.09  |
| 20 | 4 | Sequence | 0 | 452.08 | 59.85  |
| 20 | 5 | Sequence | 0 | 474.67 | 65.23  |
| 20 | 6 | Random   | 0 | 521.83 | 49.76  |
| 20 | 7 | Random   | 0 | 504.33 | 72.63  |
| 20 | 8 | Sequence | 0 | 487.92 | 61.41  |
| 21 | 1 | Random   | 0 | 458.42 | 50.01  |
| 21 | 2 | Sequence | 0 | 492.17 | 62.51  |
| 21 | 3 | Random   | 0 | 481.67 | 62.56  |
| 21 | 4 | Sequence | 0 | 452.08 | 59.45  |
| 21 | 5 | Sequence | 0 | 463.08 | 84.70  |
| 21 | 6 | Random   | 0 | 517.75 | 152.12 |
| 21 | 7 | Random   | 0 | 452.50 | 67.23  |
| 21 | 8 | Sequence | 0 | 435.08 | 51.46  |

**Task 2**

| ID | SEQ_LENGTH | TEMPO_BPM | SUM_KEY_ERRORS | IRI_MEAN | IRI_SD  |
|----|------------|-----------|----------------|----------|---------|
| 1  | 6          | 80        | 0              | 757.60   | 8.91    |
| 1  | 7          | 80        | 0              | 742.50   | 61.96   |
| 1  | 8          | 80        | 0              | 734.57   | 29.57   |
| 1  | 9          | 80        | 1              | 910.78   | 462.97  |
| 2  | 6          | 80        | 0              | 728.60   | 20.55   |
| 2  | 7          | 80        | 0              | 751.17   | 21.24   |
| 2  | 8          | 80        | 0              | 721.43   | 49.95   |
| 2  | 9          | 80        | 5              | 782.46   | 260.03  |
| 3  | 6          | 80        | 0              | 723.80   | 52.04   |
| 3  | 7          | 80        | 0              | 738.67   | 44.47   |
| 3  | 8          | 80        | 0              | 715.71   | 38.92   |
| 3  | 9          | 80        | 0              | 749.00   | 35.61   |
| 4  | 6          | 80        | 0              | 646.40   | 59.14   |
| 4  | 7          | 80        | 0              | 646.33   | 37.29   |
| 4  | 8          | 80        | 0              | 673.57   | 45.38   |
| 4  | 9          | 80        | 3              | 681.91   | 190.40  |
| 5  | 6          | 80        | 0              | 683.80   | 19.43   |
| 5  | 7          | 80        | 2              | 817.13   | 315.79  |
| 5  | 8          | 80        | 0              | 738.57   | 39.11   |
| 5  | 9          | 80        | 3              | 759.09   | 115.95  |
| 6  | 6          | 80        | 0              | 738.80   | 66.69   |
| 6  | 7          | 80        | 0              | 739.33   | 59.42   |
| 6  | 8          | 80        | 0              | 725.29   | 41.19   |
| 6  | 9          | 80        | 0              | 749.13   | 41.54   |
| 7  | 6          | 80        | 0              | 661.00   | 25.73   |
| 7  | 7          | 80        | 2              | 654.13   | 107.60  |
| 7  | 8          | 80        | 0              | 736.29   | 45.78   |
| 7  | 9          | 80        | 0              | 727.75   | 34.77   |
| 8  | 6          | 80        | 1              | 685.17   | 93.05   |
| 8  | 7          | 80        | 2              | 683.25   | 48.35   |
| 8  | 8          | 80        | 0              | 675.29   | 41.16   |
| 8  | 9          | 80        | 0              | 709.50   | 66.68   |
| 9  | 6          | 80        | 0              | 704.60   | 42.37   |
| 9  | 7          | 80        | 1              | 683.29   | 60.32   |
| 9  | 8          | 80        | 0              | 717.43   | 27.60   |
| 9  | 9          | 80        | 0              | 713.13   | 47.18   |
| 10 | 6          | 80        | 0              | 746.60   | 65.69   |
| 10 | 7          | 80        | 0              | 733.17   | 44.94   |
| 10 | 8          | 80        | 0              | 737.86   | 30.45   |
| 10 | 9          | 80        | 0              | 751.00   | 37.34   |
| 11 | 6          | 80        | 0              | 733.20   | 30.31   |
| 11 | 7          | 80        | 3              | 1164.78  | 1058.47 |
| 11 | 8          | 80        | 0              | 734.86   | 51.60   |

|    |   |    |   |         |         |
|----|---|----|---|---------|---------|
| 11 | 9 | 80 | 0 | 738.13  | 140.34  |
| 12 | 6 | 80 | 3 | 937.13  | 574.56  |
| 12 | 7 | 80 | 0 | 703.33  | 39.32   |
| 12 | 8 | 80 | 0 | 734.43  | 41.10   |
| 12 | 9 | 80 | 0 | 739.88  | 35.43   |
| 13 | 6 | 80 | 0 | 748.40  | 41.00   |
| 13 | 7 | 80 | 0 | 738.00  | 50.66   |
| 13 | 8 | 80 | 0 | 727.43  | 18.27   |
| 13 | 9 | 80 | 1 | 736.89  | 65.92   |
| 14 | 6 | 80 | 1 | 683.33  | 163.87  |
| 14 | 7 | 80 | 2 | 658.38  | 118.05  |
| 14 | 8 | 80 | 0 | 708.29  | 27.57   |
| 14 | 9 | 80 | 3 | 612.27  | 177.21  |
| 15 | 6 | 80 | 0 | 738.00  | 27.29   |
| 15 | 7 | 80 | 0 | 711.00  | 52.24   |
| 15 | 8 | 80 | 0 | 729.14  | 40.70   |
| 15 | 9 | 80 | 1 | 739.00  | 85.30   |
| 16 | 6 | 80 | 0 | 750.40  | 25.81   |
| 16 | 7 | 80 | 0 | 728.67  | 78.16   |
| 16 | 8 | 80 | 0 | 707.57  | 42.15   |
| 16 | 9 | 80 | 1 | 831.11  | 308.39  |
| 17 | 6 | 80 | 0 | 725.20  | 19.77   |
| 17 | 7 | 80 | 0 | 733.67  | 37.72   |
| 17 | 8 | 80 | 0 | 735.43  | 43.04   |
| 17 | 9 | 80 | 0 | 694.88  | 21.96   |
| 18 | 6 | 80 | 0 | 742.00  | 61.28   |
| 18 | 7 | 80 | 1 | 832.14  | 267.46  |
| 18 | 8 | 80 | 0 | 741.86  | 34.91   |
| 18 | 9 | 80 | 2 | 774.20  | 90.48   |
| 19 | 6 | 80 | 0 | 733.00  | 75.36   |
| 19 | 7 | 80 | 0 | 718.83  | 29.33   |
| 19 | 8 | 80 | 0 | 711.14  | 51.78   |
| 19 | 9 | 80 | 0 | 1094.63 | 1116.69 |
| 20 | 6 | 80 | 0 | 711.20  | 33.60   |
| 20 | 7 | 80 | 0 | 724.17  | 67.57   |
| 20 | 8 | 80 | 0 | 722.71  | 63.47   |
| 20 | 9 | 80 | 0 | 733.50  | 23.17   |
| 21 | 6 | 80 | 0 | 759.40  | 20.65   |
| 21 | 7 | 80 | 0 | 739.33  | 48.78   |
| 21 | 8 | 80 | 0 | 733.57  | 33.48   |
| 21 | 9 | 80 | 0 | 738.63  | 26.76   |
| 1  | 6 | 66 | 0 | 895.80  | 40.95   |
| 1  | 7 | 66 | 0 | 881.67  | 101.35  |
| 1  | 9 | 66 | 1 | 907.56  | 65.42   |
| 2  | 6 | 66 | 0 | 886.60  | 48.41   |

|    |   |    |   |        |        |
|----|---|----|---|--------|--------|
| 2  | 7 | 66 | 0 | 887.83 | 32.02  |
| 2  | 9 | 66 | 0 | 841.63 | 52.09  |
| 3  | 6 | 66 | 0 | 888.00 | 65.78  |
| 3  | 7 | 66 | 0 | 868.17 | 100.97 |
| 3  | 9 | 66 | 0 | 864.13 | 42.38  |
| 4  | 6 | 66 | 0 | 823.00 | 58.17  |
| 4  | 7 | 66 | 1 | 826.71 | 137.55 |
| 4  | 9 | 66 | 0 | 857.13 | 85.81  |
| 5  | 6 | 66 | 0 | 897.40 | 57.33  |
| 5  | 7 | 66 | 0 | 880.50 | 79.70  |
| 5  | 9 | 66 | 0 | 888.00 | 31.74  |
| 6  | 6 | 66 | 0 | 917.20 | 39.69  |
| 6  | 7 | 66 | 0 | 917.00 | 162.10 |
| 6  | 9 | 66 | 0 | 916.75 | 70.78  |
| 7  | 6 | 66 | 0 | 865.80 | 24.78  |
| 7  | 7 | 66 | 0 | 813.67 | 37.77  |
| 7  | 9 | 66 | 0 | 925.13 | 66.90  |
| 8  | 6 | 66 | 0 | 884.20 | 82.17  |
| 8  | 7 | 66 | 0 | 826.00 | 52.41  |
| 8  | 9 | 66 | 0 | 823.75 | 82.76  |
| 9  | 6 | 66 | 0 | 859.00 | 80.25  |
| 9  | 7 | 66 | 0 | 844.00 | 59.19  |
| 9  | 9 | 66 | 1 | 799.56 | 69.34  |
| 10 | 6 | 66 | 0 | 883.60 | 44.60  |
| 10 | 7 | 66 | 0 | 895.00 | 20.76  |
| 10 | 9 | 66 | 0 | 902.25 | 34.90  |
| 11 | 6 | 66 | 0 | 896.40 | 57.06  |
| 11 | 7 | 66 | 0 | 897.67 | 60.31  |
| 11 | 9 | 66 | 1 | 906.22 | 44.90  |
| 12 | 6 | 66 | 0 | 902.40 | 29.61  |
| 12 | 7 | 66 | 0 | 833.50 | 66.33  |
| 12 | 9 | 66 | 0 | 857.13 | 34.54  |
| 13 | 6 | 66 | 0 | 898.60 | 36.81  |
| 13 | 7 | 66 | 0 | 873.83 | 30.51  |
| 13 | 9 | 66 | 0 | 900.13 | 35.73  |
| 14 | 6 | 66 | 0 | 863.60 | 22.96  |
| 14 | 7 | 66 | 0 | 896.83 | 78.75  |
| 14 | 9 | 66 | 3 | 788.27 | 242.63 |
| 15 | 6 | 66 | 0 | 890.20 | 48.99  |
| 15 | 7 | 66 | 0 | 880.33 | 34.57  |
| 15 | 9 | 66 | 1 | 807.22 | 143.98 |
| 16 | 6 | 66 | 0 | 873.40 | 74.45  |
| 16 | 7 | 66 | 0 | 878.00 | 61.91  |
| 16 | 9 | 66 | 0 | 897.25 | 27.71  |
| 17 | 6 | 66 | 0 | 886.20 | 42.10  |



|    |   |    |   |         |         |
|----|---|----|---|---------|---------|
| 17 | 7 | 66 | 0 | 887.50  | 31.43   |
| 17 | 9 | 66 | 0 | 931.25  | 59.72   |
| 18 | 6 | 66 | 0 | 897.80  | 63.97   |
| 18 | 7 | 66 | 0 | 901.00  | 33.14   |
| 18 | 9 | 66 | 0 | 906.38  | 61.29   |
| 19 | 6 | 66 | 0 | 878.20  | 50.99   |
| 19 | 7 | 66 | 0 | 885.17  | 68.03   |
| 19 | 9 | 66 | 1 | 2067.78 | 1518.10 |
| 20 | 6 | 66 | 0 | 888.20  | 62.26   |
| 20 | 7 | 66 | 0 | 885.50  | 55.45   |
| 20 | 9 | 66 | 2 | 892.50  | 52.30   |
| 21 | 6 | 66 | 0 | 914.60  | 11.10   |
| 21 | 7 | 66 | 0 | 910.67  | 37.24   |
| 21 | 9 | 66 | 0 | 914.13  | 61.77   |

**Task 3**

| ID | TRIAL | SUM_KEY_ERRORS | SUM_HAND_ERRORS | IRI_MEAN | IRI_SD  |
|----|-------|----------------|-----------------|----------|---------|
| 1  | 1     | 0              | 0               | 741.33   | 38.00   |
| 1  | 2     | 0              | 0               | 745.00   | 24.92   |
| 1  | 3     | 0              | 0               | 738.67   | 49.48   |
| 1  | 4     | 0              | 0               | 724.33   | 26.31   |
| 1  | 5     | 0              | 0               | 746.00   | 41.56   |
| 1  | 6     | 1              | 0               | 743.57   | 39.52   |
| 1  | 7     | 0              | 0               | 733.17   | 36.64   |
| 1  | 8     | 1              | 0               | 633.29   | 150.87  |
| 2  | 1     | 0              | 0               | 709.17   | 21.40   |
| 2  | 2     | 0              | 0               | 842.17   | 306.18  |
| 2  | 3     | 1              | 0               | 705.14   | 94.17   |
| 2  | 4     | 0              | 0               | 731.83   | 32.30   |
| 2  | 5     | 0              | 0               | 717.50   | 24.79   |
| 2  | 6     | 0              | 0               | 709.50   | 33.03   |
| 2  | 7     | 0              | 0               | 844.17   | 514.90  |
| 2  | 8     | 0              | 0               | 730.00   | 22.41   |
| 3  | 1     | 0              | 0               | 738.00   | 106.47  |
| 3  | 2     | 0              | 0               | 719.67   | 22.24   |
| 3  | 3     | 1              | 0               | 708.43   | 119.10  |
| 3  | 4     | 0              | 0               | 709.17   | 41.40   |
| 3  | 5     | 0              | 0               | 743.00   | 50.41   |
| 3  | 6     | 0              | 0               | 718.17   | 33.67   |
| 3  | 7     | 0              | 0               | 743.83   | 29.09   |
| 3  | 8     | 1              | 0               | 731.43   | 41.98   |
| 4  | 1     | 0              | 0               | 628.50   | 24.83   |
| 4  | 2     | 0              | 0               | 625.33   | 46.23   |
| 4  | 3     | 1              | 0               | 755.86   | 85.09   |
| 4  | 4     | 0              | 0               | 759.67   | 48.47   |
| 4  | 5     | 10             | 1               | 645.25   | 220.42  |
| 4  | 6     | 0              | 0               | 738.83   | 15.48   |
| 4  | 7     | 0              | 0               | 684.00   | 51.73   |
| 4  | 8     | 0              | 0               | 670.33   | 48.42   |
| 5  | 1     | 0              | 0               | 700.17   | 58.70   |
| 5  | 2     | 2              | 0               | 1127.25  | 814.80  |
| 5  | 3     | 2              | 0               | 839.50   | 247.68  |
| 5  | 4     | 3              | 0               | 1150.56  | 706.77  |
| 5  | 5     | 0              | 0               | 751.83   | 32.38   |
| 5  | 6     | 2              | 0               | 741.75   | 50.12   |
| 5  | 7     | 1              | 0               | 862.00   | 314.53  |
| 5  | 8     | 0              | 0               | 758.33   | 64.50   |
| 6  | 1     | 0              | 0               | 729.67   | 88.36   |
| 6  | 2     | 0              | 0               | 749.83   | 48.24   |
| 6  | 3     | 1              | 0               | 1052.14  | 890.61  |
| 6  | 4     | 2              | 0               | 1286.25  | 1060.86 |
| 6  | 5     | 0              | 0               | 753.50   | 80.73   |
| 6  | 6     | 0              | 0               | 760.83   | 59.13   |

|    |   |   |   |         |         |
|----|---|---|---|---------|---------|
| 6  | 7 | 2 | 0 | 1585.13 | 1843.19 |
| 6  | 8 | 6 | 1 | 2556.58 | 1493.43 |
| 7  | 1 | 0 | 0 | 745.83  | 62.19   |
| 7  | 2 | 0 | 0 | 744.83  | 25.69   |
| 7  | 3 | 1 | 0 | 729.14  | 78.31   |
| 7  | 4 | 0 | 0 | 750.33  | 49.88   |
| 7  | 5 | 0 | 0 | 758.17  | 47.75   |
| 7  | 6 | 0 | 0 | 747.50  | 38.99   |
| 7  | 7 | 0 | 0 | 739.43  | 82.77   |
| 7  | 8 | 0 | 0 | 796.33  | 31.43   |
| 8  | 1 | 0 | 0 | 683.33  | 60.69   |
| 8  | 2 | 1 | 0 | 667.00  | 74.56   |
| 8  | 3 | 3 | 0 | 694.44  | 86.38   |
| 8  | 4 | 3 | 0 | 711.67  | 185.95  |
| 8  | 5 | 0 | 0 | 693.17  | 33.69   |
| 8  | 6 | 0 | 0 | 705.83  | 27.91   |
| 8  | 7 | 0 | 0 | 674.50  | 45.72   |
| 8  | 8 | 0 | 0 | 679.67  | 45.88   |
| 9  | 1 | 2 | 0 | 729.25  | 113.35  |
| 9  | 2 | 2 | 0 | 646.13  | 160.07  |
| 9  | 3 | 2 | 0 | 737.25  | 102.34  |
| 9  | 4 | 1 | 0 | 702.14  | 82.47   |
| 9  | 5 | 0 | 1 | 736.00  | 30.17   |
| 9  | 6 | 1 | 0 | 702.14  | 75.98   |
| 9  | 7 | 2 | 0 | 632.63  | 145.97  |
| 9  | 8 | 0 | 0 | 711.17  | 23.23   |
| 10 | 1 | 0 | 0 | 740.83  | 47.80   |
| 10 | 2 | 0 | 0 | 741.17  | 32.16   |
| 10 | 3 | 0 | 0 | 749.33  | 41.60   |
| 10 | 4 | 0 | 0 | 750.83  | 52.51   |
| 10 | 5 | 0 | 0 | 748.33  | 52.74   |
| 10 | 6 | 0 | 0 | 748.83  | 34.87   |
| 10 | 7 | 1 | 0 | 733.57  | 30.69   |
| 10 | 8 | 0 | 0 | 758.33  | 54.31   |
| 11 | 1 | 1 | 0 | 727.57  | 91.61   |
| 11 | 2 | 3 | 0 | 735.56  | 78.53   |
| 11 | 3 | 1 | 0 | 758.00  | 60.31   |
| 11 | 4 | 0 | 0 | 734.67  | 47.50   |
| 11 | 5 | 0 | 0 | 766.00  | 72.45   |
| 11 | 6 | 2 | 0 | 747.38  | 149.88  |
| 11 | 7 | 2 | 0 | 718.88  | 53.89   |
| 11 | 8 | 0 | 0 | 721.33  | 49.28   |
| 12 | 1 | 1 | 0 | 747.57  | 39.69   |
| 12 | 2 | 1 | 0 | 743.71  | 47.72   |
| 12 | 3 | 6 | 0 | 742.00  | 66.64   |
| 12 | 4 | 0 | 0 | 735.50  | 22.67   |
| 12 | 5 | 2 | 0 | 746.88  | 32.55   |
| 12 | 6 | 0 | 0 | 739.67  | 33.72   |

|    |   |   |   |         |         |
|----|---|---|---|---------|---------|
| 12 | 7 | 2 | 0 | 750.00  | 39.81   |
| 12 | 8 | 0 | 0 | 755.67  | 93.13   |
| 13 | 1 | 0 | 0 | 735.83  | 61.15   |
| 13 | 2 | 0 | 0 | 725.83  | 32.11   |
| 13 | 3 | 1 | 0 | 763.43  | 178.06  |
| 13 | 4 | 0 | 0 | 705.17  | 28.22   |
| 13 | 5 | 1 | 0 | 1049.29 | 840.13  |
| 13 | 6 | 7 | 1 | 1413.08 | 1205.04 |
| 13 | 7 | 1 | 0 | 747.14  | 70.22   |
| 13 | 8 | 6 | 0 | 815.17  | 406.02  |
| 14 | 1 | 3 | 0 | 612.78  | 262.09  |
| 14 | 2 | 5 | 0 | 602.36  | 151.71  |
| 14 | 3 | 2 | 0 | 614.00  | 168.84  |
| 14 | 4 | 1 | 0 | 651.43  | 155.54  |
| 14 | 5 | 0 | 0 | 743.67  | 53.68   |
| 14 | 6 | 2 | 0 | 789.88  | 290.24  |
| 14 | 7 | 2 | 0 | 662.13  | 97.24   |
| 14 | 8 | 2 | 0 | 669.00  | 202.91  |
| 15 | 1 | 0 | 0 | 728.50  | 48.22   |
| 15 | 2 | 2 | 0 | 783.63  | 247.78  |
| 15 | 3 | 1 | 0 | 658.14  | 161.78  |
| 15 | 4 | 0 | 0 | 734.00  | 27.20   |
| 15 | 5 | 1 | 0 | 668.00  | 119.96  |
| 15 | 6 | 0 | 0 | 724.17  | 30.75   |
| 15 | 7 | 1 | 0 | 1058.43 | 848.45  |
| 15 | 8 | 0 | 0 | 721.67  | 32.84   |
| 16 | 1 | 0 | 0 | 846.50  | 307.39  |
| 16 | 2 | 2 | 0 | 1133.50 | 541.07  |
| 16 | 3 | 3 | 0 | 993.89  | 428.80  |
| 16 | 4 | 2 | 0 | 1019.25 | 560.28  |
| 16 | 5 | 0 | 1 | 732.14  | 33.21   |
| 16 | 6 | 6 | 0 | 1353.25 | 805.57  |
| 16 | 7 | 2 | 0 | 825.13  | 273.22  |
| 16 | 8 | 0 | 0 | 732.33  | 34.42   |
| 17 | 1 | 0 | 0 | 753.00  | 51.99   |
| 17 | 2 | 4 | 0 | 1867.20 | 2196.61 |
| 17 | 3 | 1 | 0 | 756.14  | 98.91   |
| 17 | 4 | 1 | 0 | 730.71  | 110.99  |
| 17 | 5 | 2 | 0 | 752.50  | 96.12   |
| 17 | 6 | 1 | 0 | 750.86  | 55.23   |
| 17 | 7 | 0 | 0 | 734.00  | 38.76   |
| 17 | 8 | 1 | 0 | 739.57  | 59.44   |
| 18 | 1 | 1 | 0 | 751.14  | 237.30  |
| 18 | 2 | 1 | 0 | 732.86  | 113.81  |
| 18 | 3 | 2 | 0 | 902.00  | 273.18  |
| 18 | 4 | 1 | 0 | 703.14  | 55.34   |
| 18 | 5 | 5 | 0 | 1076.73 | 616.70  |
| 18 | 6 | 0 | 0 | 692.00  | 31.77   |

|    |   |   |   |         |        |
|----|---|---|---|---------|--------|
| 18 | 7 | 3 | 0 | 723.00  | 239.16 |
| 18 | 8 | 4 | 1 | 535.80  | 128.16 |
| 19 | 1 | 0 | 0 | 680.33  | 48.80  |
| 19 | 2 | 3 | 0 | 1012.78 | 488.66 |
| 19 | 3 | 1 | 0 | 848.86  | 334.12 |
| 19 | 4 | 0 | 0 | 729.50  | 35.31  |
| 19 | 5 | 1 | 0 | 735.00  | 65.17  |
| 19 | 6 | 2 | 0 | 1672.38 | 680.37 |
| 19 | 7 | 1 | 0 | 735.00  | 102.71 |
| 19 | 8 | 0 | 0 | 704.33  | 17.59  |
| 20 | 1 | 0 | 0 | 715.17  | 32.08  |
| 20 | 2 | 3 | 0 | 743.67  | 32.20  |
| 20 | 3 | 3 | 0 | 744.56  | 39.69  |
| 20 | 4 | 0 | 0 | 725.83  | 15.20  |
| 20 | 5 | 0 | 1 | 726.50  | 70.66  |
| 20 | 6 | 2 | 0 | 749.00  | 40.00  |
| 20 | 7 | 0 | 0 | 746.67  | 39.25  |
| 20 | 8 | 3 | 0 | 826.22  | 241.58 |
| 21 | 1 | 0 | 0 | 757.50  | 37.89  |
| 21 | 2 | 1 | 0 | 753.29  | 41.23  |
| 21 | 3 | 0 | 0 | 740.17  | 47.80  |
| 21 | 4 | 0 | 0 | 763.33  | 28.24  |
| 21 | 5 | 0 | 0 | 763.17  | 34.08  |
| 21 | 6 | 0 | 0 | 749.67  | 14.67  |
| 21 | 7 | 0 | 0 | 757.83  | 32.54  |
| 21 | 8 | 1 | 0 | 743.14  | 33.96  |

**Task 4**

| ID | FIGURE       | FEEDBACK_CONDITION | DIST_Mean | SUM_TIME_DIFF |
|----|--------------|--------------------|-----------|---------------|
| 1  | Sinewave     | With Feedback      | 60.78     | 79015         |
| 1  | Sinewave     | Muted              | 43.71     | 65741         |
| 1  | Sinewave     | With Feedback      | 48.85     | 67075         |
| 1  | Sinewave     | Muted              | 31.82     | 44233         |
| 1  | Trianglewave | With Feedback      | 46.52     | 58668         |
| 1  | Trianglewave | Muted              | 59.38     | 77012         |
| 1  | Trianglewave | With Feedback      | 35.37     | 53193         |
| 1  | Trianglewave | Muted              | 51.17     | 70723         |
| 2  | Sinewave     | Muted              | 6.14      | 17571         |
| 2  | Sinewave     | With Feedback      | 4.81      | 10431         |
| 2  | Sinewave     | Muted              | 6.24      | 12980         |
| 2  | Sinewave     | With Feedback      | 6.04      | 11140         |
| 2  | Trianglewave | With Feedback      | 5.86      | 11626         |
| 2  | Trianglewave | Muted              | 6.34      | 12520         |
| 2  | Trianglewave | With Feedback      | 11.04     | 19975         |
| 2  | Trianglewave | Muted              | 5.64      | 12314         |
| 3  | Sinewave     | Muted              | 4.14      | 10667         |
| 3  | Sinewave     | With Feedback      | 3.97      | 10136         |
| 3  | Sinewave     | Muted              | 4.13      | 10968         |
| 3  | Sinewave     | With Feedback      | 3.91      | 9518          |
| 3  | Trianglewave | Muted              | 5.79      | 15437         |
| 3  | Trianglewave | With Feedback      | 4.35      | 12391         |
| 3  | Trianglewave | Muted              | 4.79      | 13916         |
| 3  | Trianglewave | With Feedback      | 4.31      | 12802         |
| 4  | Sinewave     | With Feedback      | 3.63      | 11499         |
| 4  | Sinewave     | Muted              | 3.94      | 11840         |
| 4  | Sinewave     | With Feedback      | 4.00      | 9408          |
| 4  | Sinewave     | Muted              | 4.52      | 12467         |
| 4  | Trianglewave | Muted              | 3.73      | 12500         |
| 4  | Trianglewave | With Feedback      | 552.37    | 3159018       |
| 4  | Trianglewave | Muted              | 4.90      | 12985         |
| 4  | Trianglewave | With Feedback      | 4.12      | 12039         |
| 5  | Sinewave     | Muted              | 32.11     | 77993         |
| 5  | Sinewave     | With Feedback      | 10.47     | 22049         |
| 5  | Sinewave     | Muted              | 7.20      | 17164         |
| 5  | Sinewave     | With Feedback      | 12.47     | 25848         |
| 5  | Trianglewave | With Feedback      | 59.63     | 149960        |
| 5  | Trianglewave | Muted              | 22.31     | 40890         |
| 5  | Trianglewave | With Feedback      | 12.52     | 37657         |
| 5  | Trianglewave | Muted              | 21.82     | 56699         |
| 6  | Sinewave     | Muted              | 5.53      | 13211         |
| 6  | Sinewave     | With Feedback      | 56.66     | 125662        |
| 6  | Sinewave     | Muted              | 53.58     | 108008        |
| 6  | Sinewave     | With Feedback      | 31.79     | 75765         |
| 6  | Trianglewave | Muted              | 24.37     | 88654         |
| 6  | Trianglewave | With Feedback      | 4.22      | 12250         |

|    |              |               |        |         |
|----|--------------|---------------|--------|---------|
| 6  | Trianglewave | Muted         | 43.46  | 98398   |
| 6  | Trianglewave | With Feedback | 37.66  | 83673   |
| 7  | Sinewave     | With Feedback | 35.92  | 45371   |
| 7  | Sinewave     | Muted         | 25.30  | 30231   |
| 7  | Sinewave     | With Feedback | 83.40  | 99243   |
| 7  | Sinewave     | Muted         | 138.08 | 222315  |
| 7  | Trianglewave | Muted         | 7.67   | 14946   |
| 7  | Trianglewave | With Feedback | 29.84  | 46961   |
| 7  | Trianglewave | Muted         | 28.09  | 40502   |
| 7  | Trianglewave | With Feedback | 32.91  | 43444   |
| 8  | Sinewave     | With Feedback | 42.06  | 87451   |
| 8  | Sinewave     | Muted         | 24.65  | 59614   |
| 8  | Sinewave     | With Feedback | 19.41  | 43413   |
| 8  | Sinewave     | Muted         | 26.83  | 71257   |
| 8  | Trianglewave | Muted         | 6.14   | 15460   |
| 8  | Trianglewave | With Feedback | 4.45   | 10317   |
| 8  | Trianglewave | Muted         | 12.68  | 27813   |
| 8  | Trianglewave | With Feedback | 14.16  | 36922   |
| 9  | Sinewave     | With Feedback | 4.27   | 11205   |
| 9  | Sinewave     | Muted         | 4.65   | 12258   |
| 9  | Sinewave     | With Feedback | 3.67   | 9523    |
| 9  | Sinewave     | Muted         | 3.55   | 8332    |
| 9  | Trianglewave | With Feedback | 4.33   | 12546   |
| 9  | Trianglewave | Muted         | 4.65   | 13723   |
| 9  | Trianglewave | With Feedback | 5.28   | 8997    |
| 9  | Trianglewave | Muted         | 16.63  | 38147   |
| 10 | Sinewave     | Muted         | 3.39   | 9566    |
| 10 | Sinewave     | With Feedback | 3.63   | 9665    |
| 10 | Sinewave     | Muted         | 3.38   | 10722   |
| 10 | Sinewave     | With Feedback | 17.96  | 53895   |
| 10 | Trianglewave | With Feedback | 3.99   | 12233   |
| 10 | Trianglewave | Muted         | 3.24   | 11513   |
| 10 | Trianglewave | With Feedback | 3.15   | 11141   |
| 10 | Trianglewave | Muted         | 3.45   | 12297   |
| 11 | Sinewave     | With Feedback | 5.19   | 11452   |
| 11 | Sinewave     | Muted         | 5.22   | 11660   |
| 11 | Sinewave     | With Feedback | 5.08   | 9577    |
| 11 | Sinewave     | Muted         | 29.62  | 54289   |
| 11 | Trianglewave | Muted         | 5.28   | 13078   |
| 11 | Trianglewave | With Feedback | 7.73   | 13709   |
| 11 | Trianglewave | Muted         | 5.55   | 11447   |
| 11 | Trianglewave | With Feedback | 5.67   | 12886   |
| 12 | Sinewave     | With Feedback | 467.21 | 1236699 |
| 12 | Sinewave     | Muted         | 5.60   | 8804    |
| 12 | Sinewave     | With Feedback | 79.58  | 133622  |
| 12 | Sinewave     | Muted         | 3.94   | 6449    |
| 12 | Trianglewave | With Feedback | 6.38   | 10368   |
| 12 | Trianglewave | Muted         | 5.10   | 9746    |

|    |              |               |       |       |
|----|--------------|---------------|-------|-------|
| 12 | Trianglewave | With Feedback | 5.02  | 7962  |
| 12 | Trianglewave | Muted         | 6.04  | 10154 |
| 13 | Sinewave     | Muted         | 5.65  | 10089 |
| 13 | Sinewave     | With Feedback | 7.53  | 13392 |
| 13 | Sinewave     | Muted         | 7.40  | 15628 |
| 13 | Sinewave     | With Feedback | 4.91  | 9705  |
| 13 | Trianglewave | With Feedback | 7.15  | 13965 |
| 13 | Trianglewave | Muted         | 5.89  | 11760 |
| 13 | Trianglewave | With Feedback | 5.43  | 11708 |
| 13 | Trianglewave | Muted         | 6.16  | 11741 |
| 14 | Sinewave     | With Feedback | 20.53 | 26479 |
| 14 | Sinewave     | Muted         | 26.28 | 36823 |
| 14 | Sinewave     | With Feedback | 29.81 | 46171 |
| 14 | Sinewave     | Muted         | 23.84 | 36552 |
| 14 | Trianglewave | With Feedback | 51.51 | 77160 |
| 14 | Trianglewave | Muted         | 23.93 | 52182 |
| 14 | Trianglewave | With Feedback | 23.90 | 33409 |
| 14 | Trianglewave | Muted         | 25.51 | 38498 |
| 15 | Sinewave     | With Feedback | 6.18  | 10794 |
| 15 | Sinewave     | Muted         | 5.37  | 9253  |
| 15 | Sinewave     | With Feedback | 7.05  | 9729  |
| 15 | Sinewave     | Muted         | 5.52  | 7848  |
| 15 | Trianglewave | Muted         | 5.93  | 11916 |
| 15 | Trianglewave | With Feedback | 5.73  | 9276  |
| 15 | Trianglewave | Muted         | 7.71  | 12449 |
| 15 | Trianglewave | With Feedback | 6.24  | 9716  |
| 16 | Sinewave     | Muted         | 3.95  | 10132 |
| 16 | Sinewave     | With Feedback | 4.45  | 9808  |
| 16 | Sinewave     | Muted         | 5.00  | 10459 |
| 16 | Sinewave     | With Feedback | 4.78  | 9433  |
| 16 | Trianglewave | Muted         | 4.74  | 11678 |
| 16 | Trianglewave | With Feedback | 33.05 | 69479 |
| 16 | Trianglewave | Muted         | 4.44  | 8996  |
| 16 | Trianglewave | With Feedback | 4.50  | 9821  |
| 17 | Sinewave     | With Feedback | 11.11 | 32657 |
| 17 | Sinewave     | Muted         | 28.54 | 84835 |
| 17 | Sinewave     | With Feedback | 15.12 | 42991 |
| 17 | Sinewave     | Muted         | 7.99  | 21313 |
| 17 | Trianglewave | With Feedback | 25.04 | 78184 |
| 17 | Trianglewave | Muted         | 10.62 | 32039 |
| 17 | Trianglewave | With Feedback | 21.26 | 65066 |
| 17 | Trianglewave | Muted         | 26.31 | 80579 |
| 18 | Sinewave     | Muted         | 4.13  | 11475 |
| 18 | Sinewave     | With Feedback | 4.26  | 11394 |
| 18 | Sinewave     | Muted         | 3.85  | 11475 |
| 18 | Sinewave     | With Feedback | 5.56  | 14449 |
| 18 | Trianglewave | Muted         | 5.76  | 16323 |
| 18 | Trianglewave | With Feedback | 6.12  | 12566 |



|    |              |               |       |        |
|----|--------------|---------------|-------|--------|
| 18 | Trianglewave | Muted         | 4.98  | 15975  |
| 18 | Trianglewave | With Feedback | 4.59  | 13643  |
| 19 | Sinewave     | Muted         | 4.41  | 10554  |
| 19 | Sinewave     | With Feedback | 5.42  | 8164   |
| 19 | Sinewave     | Muted         | 5.25  | 10189  |
| 19 | Sinewave     | With Feedback | 5.21  | 8356   |
| 19 | Trianglewave | With Feedback | 4.85  | 11550  |
| 19 | Trianglewave | Muted         | 13.39 | 26616  |
| 19 | Trianglewave | With Feedback | 19.58 | 32803  |
| 19 | Trianglewave | Muted         | 6.78  | 12048  |
| 20 | Sinewave     | Muted         | 24.45 | 45582  |
| 20 | Sinewave     | With Feedback | 23.00 | 47026  |
| 20 | Sinewave     | Muted         | 29.20 | 59284  |
| 20 | Sinewave     | With Feedback | 19.66 | 42445  |
| 20 | Trianglewave | Muted         | 87.30 | 149199 |
| 20 | Trianglewave | With Feedback | 31.79 | 50413  |
| 20 | Trianglewave | Muted         | 23.91 | 43701  |
| 20 | Trianglewave | With Feedback | 18.71 | 38930  |
| 21 | Sinewave     | With Feedback | 20.41 | 40352  |
| 21 | Sinewave     | Muted         | 4.73  | 10027  |
| 21 | Sinewave     | With Feedback | 4.18  | 7849   |
| 21 | Sinewave     | Muted         | 4.39  | 9687   |
| 21 | Trianglewave | With Feedback | 38.72 | 64461  |
| 21 | Trianglewave | Muted         | 5.41  | 9489   |
| 21 | Trianglewave | With Feedback | 33.91 | 57334  |
| 21 | Trianglewave | Muted         | 4.87  | 7533   |
