# Supplementary material for: Development and evaluation of a novel music-based therapeutic device for upper extremity movement training: A pre-clinical, single-arm trial
Source: PubMed Central journal article supplement (PMC7676671; doi:10.1371/journal.pone.0242552), 2020-11-19
Supplement: pone.0242552.s002.pdf [file pone.0242552.s002.pdf]

Development and evaluation of a novel music-based therapeutic device for upper  
extremity movement training: a pre-clinical, single arm trial

Nina Schaffert<sup>1,3\*</sup>, Thenille Braun Janzen<sup>2</sup>, Roy Ploigt<sup>3</sup>, Sebastian Schlüter<sup>3</sup>, Veronica Vuong<sup>4</sup>,  
Michael H. Thaut<sup>4</sup>

<sup>1</sup> Department of Movement and Training Science, Institute for Human Movement Science,  
University of Hamburg, Hamburg, Germany.

<sup>2</sup> Center for Mathematics, Computing and Cognition, Universidade Federal do ABC, São  
Bernardo do Campo, Brazil.

<sup>3</sup> BeSB GmbH Berlin, Sound Engineering, Berlin, Germany.

<sup>4</sup> Music and Health Science Research Collaboratory, Faculty of Music, University of Toronto,  
Toronto, Canada.

\*Corresponding author

E-mail: [nina.schaffert@uni-hamburg.de](mailto:nina.schaffert@uni-hamburg.de) (NS)

## Description of variable labels and definitions as provided in the SONATA output files.

### Task settings:

- **Beats per Minute (BPM)**: metronome tempo measured in number of beats per minute.
- **Inter-stimulus interval (ISI)**: Time difference between two metronome beats (in ms).
- **Interval**: time window around the metronome beats in which the patient is required to press the keys (in ms).
- **Key**: Number corresponding to the keys of the target sequence (1 to 32, from lower left to upper right).
- **Time**: Time differences between two recorded keypresses (in ms).

### Keys mode output:

In the Keys mode, each output line corresponds to one response or keypress recorded from the user's interaction with the device's touchscreen, with the following variables:

- **Metronome Event (TICK\_NO)**: number of metronome beats presented since the start of the task.
- **Sequence Number (SEQ\_NO)**: expected order of stimuli in the target sequence. Example: a sequence of 13 stimuli has 13 lines/rows.
- **Sequence Key (SEQ\_KEY)**: expected key number of the target sequence (1 to 32, from lower left to upper right).
- **Patient Key (PAT\_KEY)**: patient's actual keypress response (1 to 32, from lower left to upper right).
- **Metronome Time (TICK\_TIME)**: Time of the metronome presentation (cumulative since the beginning of the task in ms).
- **Patient Time (PAT\_TIME)**: Time of user's response (cumulative since the beginning of the task in ms).
- **Inter-Response Interval (IRI)**: Time interval between successive keypresses (in ms).
- **Synchronization Error (SE)**: Time difference between the presentation of the metronome beat and motor response (in ms).

### Drawing mode output:

In the Drawing mode, each time a user touches and moves their hand/finger on the touchscreen, a new output line appears with the following variables:

- **Patient X Coordinate (PAT\_X)**: x-coordinate of the users' input (in pixel, 0 to 1880).
- **Patient Y Coordinate (PAT\_Y)**: y-coordinate of the users' input (in pixel, 0 to 1040).
- **Target Sequence X Coordinate (SEQ\_X)**: x-coordinate of the nearest drawing/line target section (-1 if outside the corridor).
- **Target Sequence Y Coordinate (SEQ\_Y)**: y-coordinate of the nearest drawing/line target section (-1 if outside the corridor).
- **Times Difference (TIME\_DIFF)**: Time interval between successive coordinate changes (in ms).
- **Movement Distance (DIST)**: Distance between the user's input and the nearest drawing/line target section (in pixel).
